# Supplementary material
Source: MDPI journal article supplement (https://www.mdpi.com/2075-4442/11/2/86)
Supplement: s1 [file s1]

## Supplementary Information

Article

# Effect of Cu-doped Carbon Quantum Dot Dispersion Liquid on the Lubrication Performance of Polyethylene Glycol

Shusheng Liu<sup>1</sup>, Xiuqian Yu<sup>1</sup>, Enzhu Hu<sup>1,\*</sup>, Enhao Su<sup>1</sup>, Yanjie Chen<sup>1</sup>, Jianping Wang<sup>1</sup>, Kunhong Hu<sup>1</sup>, Yong Xu<sup>1</sup>, Xianguo Hu<sup>2,\*</sup> and Hua Zhong<sup>1</sup>

<sup>1</sup> School of Energy Materials and Chemical Engineering, Hefei University, Hefei 230601 P. R. China

<sup>2</sup> Institute of Tribology, Hefei University of Technology, Hefei 230009, P. R. China

\* Correspondence: huez@hfuu.edu.cn (E. H.); xghu@hfut.edu.cn (X. H.)

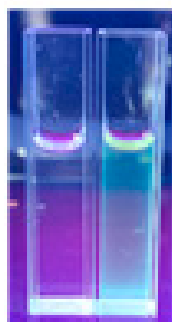

A B

**Figure S1.** Fluorescence emission spectrum of Cu-CQDs  
A: Pure PEG200 B: 0.5 wt% Cu-CQDs in PEG

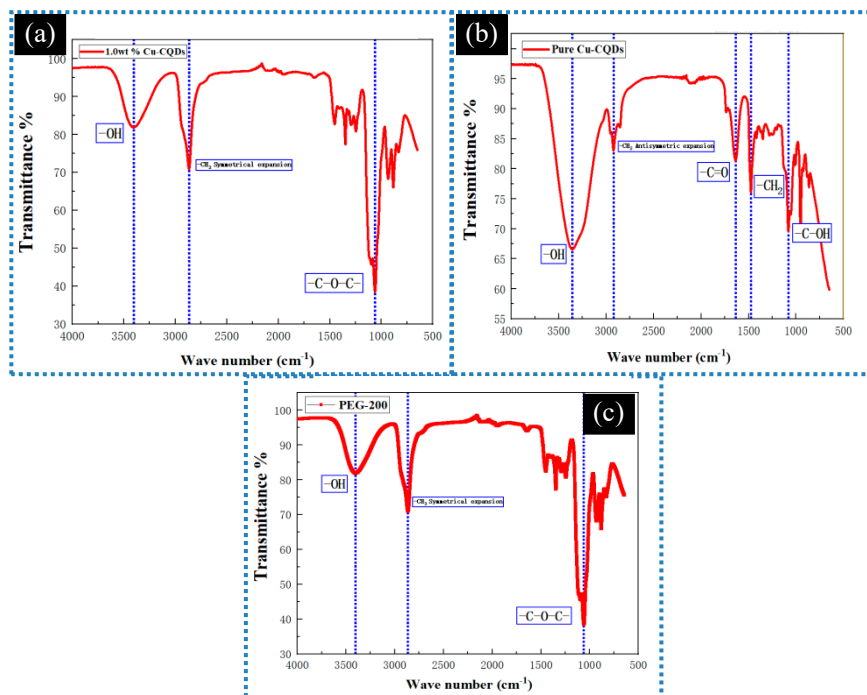

**Figure S2.** Infrared spectrogram analysis of CQDs and PEG (a) 1.0 wt%Cu-CQDs+PEG200; (b) pure Cu-CQDs; (c) PEG-200.

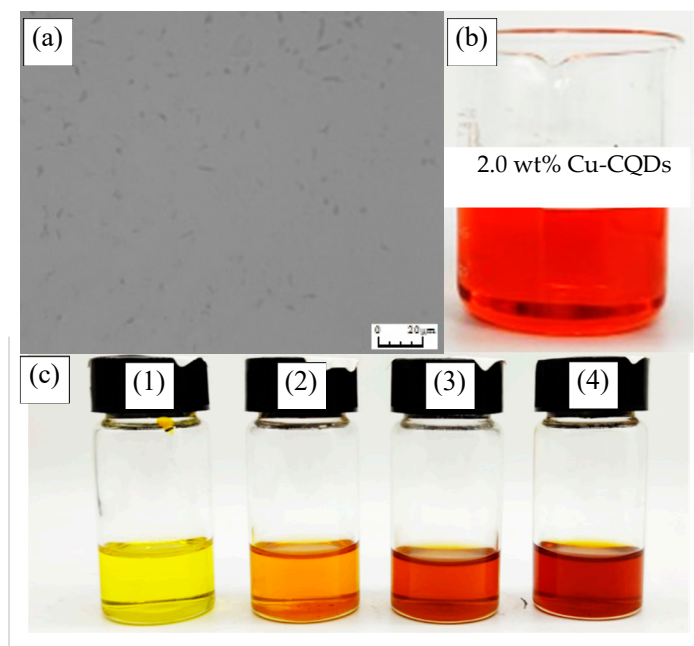

**Figure S3** (a) Agglomeration morphology of Cu-CQDs in PEG after friction; (b) Color of 2.0 wt% Cu-CQDs after passing through an air blast drying oven at 100 °C for 30 min; (c) Appearance color of oil stain at different temperatures of 2.0 wt% Cu-CQDs (1) 2.0 wt% Cu-CQDs, (2) 2.0 wt% Cu-CQDs at 25 °C, (3) 2.0 wt% Cu-CQDs at 75 °C, (4) 2.0 wt% Cu-CQDs at 100 °C
